# Supplementary material for: The Systematic Analyses of RING Finger Gene Signature for Predicting the Prognosis of Patients with Hepatocellular Carcinoma
Source: Hindawi journal article supplement (doi:10.1155/2022/2466006), 2022-09-26

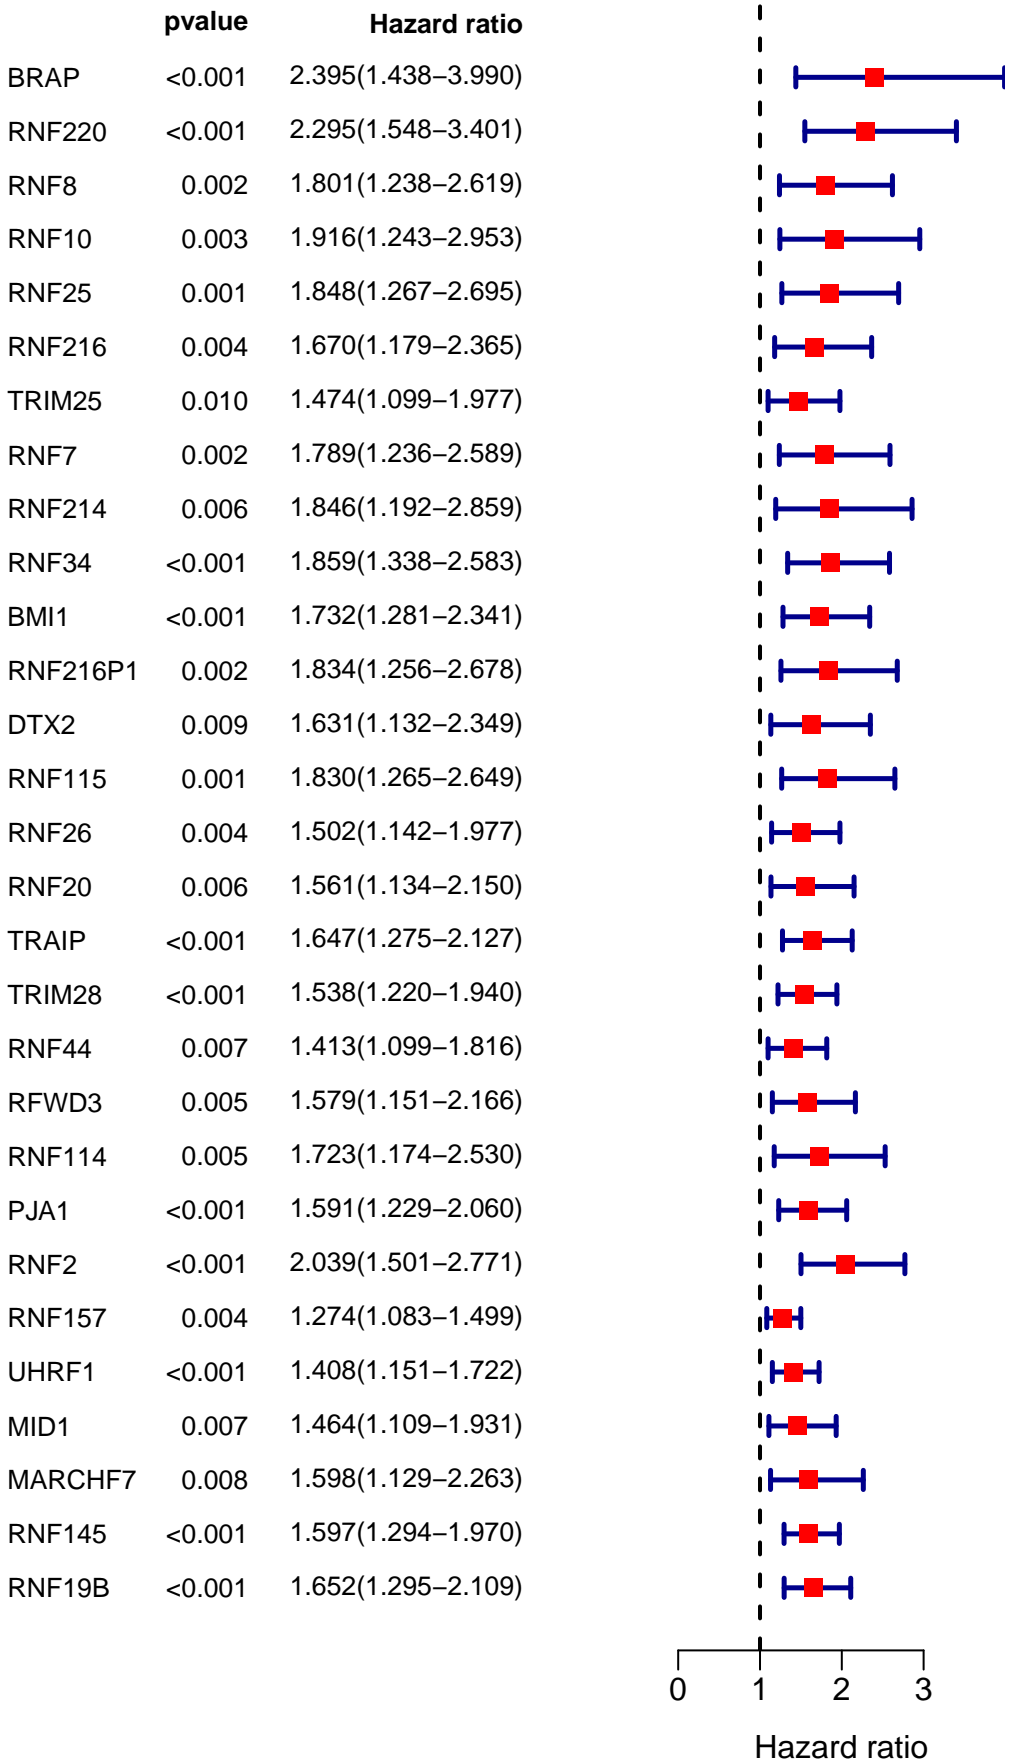

Supplement: f1 [file 2466006.f1.pdf]
